# Supplementary material for: Rivaroxaban eutectics with improved solubility, dissolution rates, bioavailability and stability
Source: Royal Society of Chemistry journal article supplement (doi:10.1039/d3ce00261f), 2023-01-01
Supplement: d3ce00261f1.pdf [file d3ce00261f1.pdf]

## Supporting Information

### **Rivaroxaban Eutectics with Improved Solubility, Dissolution Rate, Bioavailability and Stability**

*Parth S. Shaligram,<sup>a,b</sup> Christy P. George,<sup>a,c</sup> Himanshu Sharma,<sup>a,c</sup> Kakasaheb R. Mahadik,<sup>b</sup> Sharvil Patil,<sup>b</sup> Kumar Vanka,<sup>a,c</sup> S. Arulmozhi,<sup>b\*</sup> and Rajesh G. Gonnade<sup>a,c\*</sup>*

<sup>a</sup>Physical and Materials Chemistry Division, CSIR-National Chemical Laboratory, Dr. Homi Bhabha Road, Pashan, Pune, India.

<sup>b</sup>Bharati Vidyapeeth Deemed to be University, Poona College of Pharmacy, Erandwane, Pune-411 038, Maharashtra, India.

<sup>c</sup>Academy of Scientific and Innovative Research (AcSIR), Sector 19, Kamla Nehru Nagar, Ghaziabad, Uttar Pradesh 201002, India.

E-mail: [rg.gonnade@ncl.res.in](mailto:rg.gonnade@ncl.res.in)

## Contents

|                                                                                                                                       |    |
|---------------------------------------------------------------------------------------------------------------------------------------|----|
| Figure S1. Binary Phase diagrams of eutectics.....                                                                                    | 5  |
| Figure S2. DSC thermograms of eutectics.....                                                                                          | 8  |
| Figure S3. PXRD profiles of eutectics.....                                                                                            | 11 |
| Figure S4. The FTIR spectra of eutectics .....                                                                                        | 14 |
| Figure S5. DSC profiles of eutectics recorded after accelerated and long-term stability study conditions.....                         | 17 |
| Figure S6. PXRD measured for eutectics after long term stability studies .....                                                        | 20 |
| Figure S7. The optimized structures of different eutectic system (heterosynthons) at B3LYP/TZVP level of theory.....                  | 21 |
| Figure S8. The optimised structures of acids and RXB dimers (homosynthons) at B3LYP/TZVP level of theory. ....                        | 22 |
| Figure S9. The NCI plot for different acids and RXB dimer.....                                                                        | 23 |
| Figure S10. The NCI plot for different eutectic systems.....                                                                          | 24 |
| Figure S11. The crystal structure of RXB showing dimeric associations similar to predicted structure obtained using DFT studies. .... | 25 |
| Table S2. Observed vibrational frequencies for eutectics .....                                                                        | 27 |
| Table S3. Saturation solubility study of eutectics.....                                                                               | 28 |
| Saturation solubility .....                                                                                                           | 28 |
| Saturation solubility .....                                                                                                           | 28 |
| Table S4. Dissolution rate data of RXB and Physical Mixtures (mol:mol) .....                                                          | 29 |
| Table S5. Dissolution rate data of eutectics.....                                                                                     | 30 |
| Table S6. Theoretical Log P values of RXB and cofomers.....                                                                           | 31 |
| Table S7. The interaction energies ( $\Delta E_{\text{int}}$ and $\Delta G_{\text{int}}$ ) .....                                      | 32 |

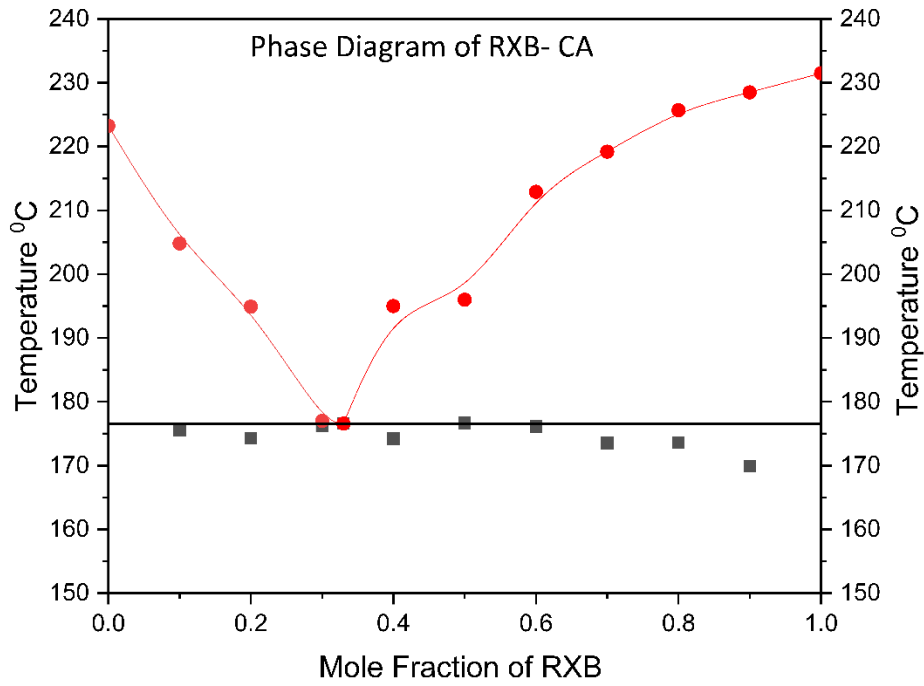

(a)

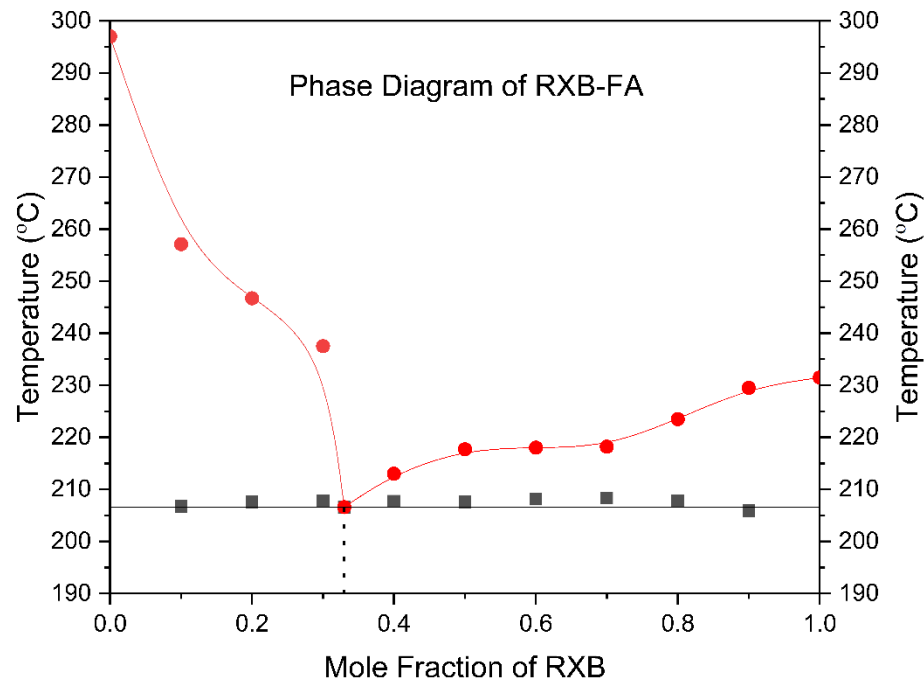

(b)

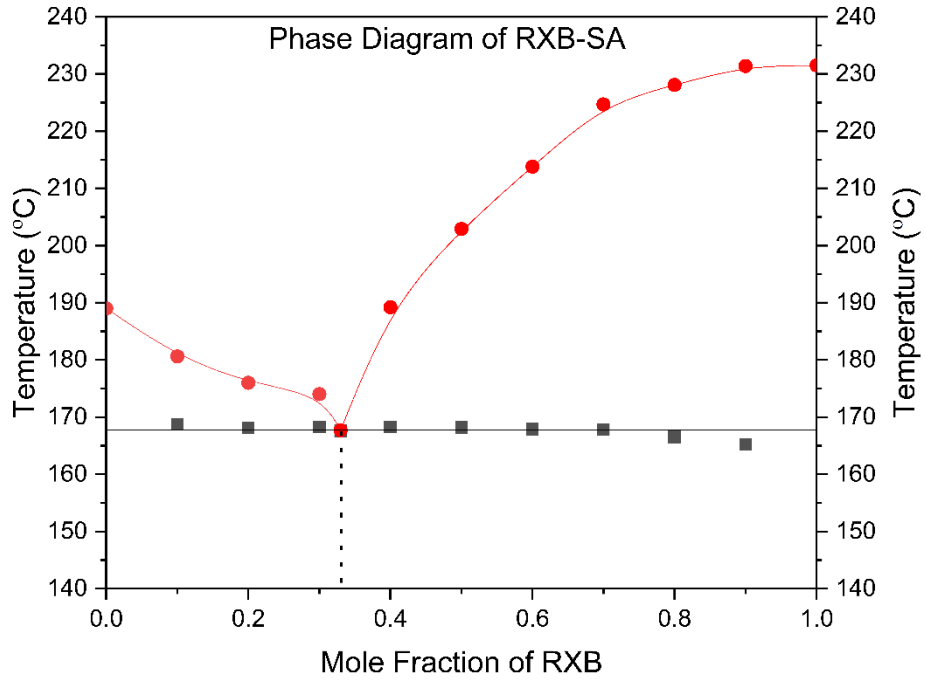

(c)

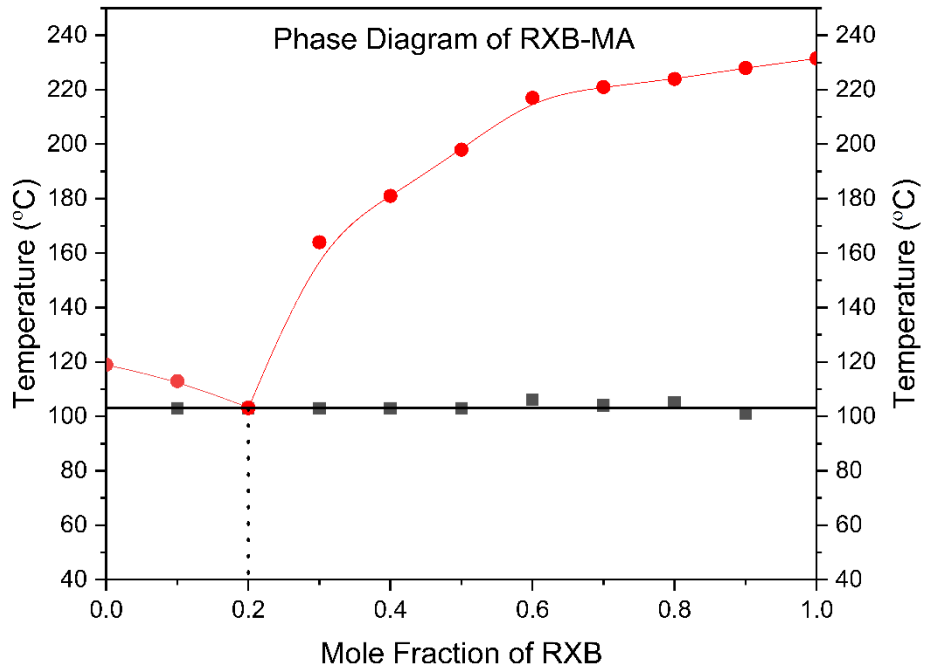

(d)

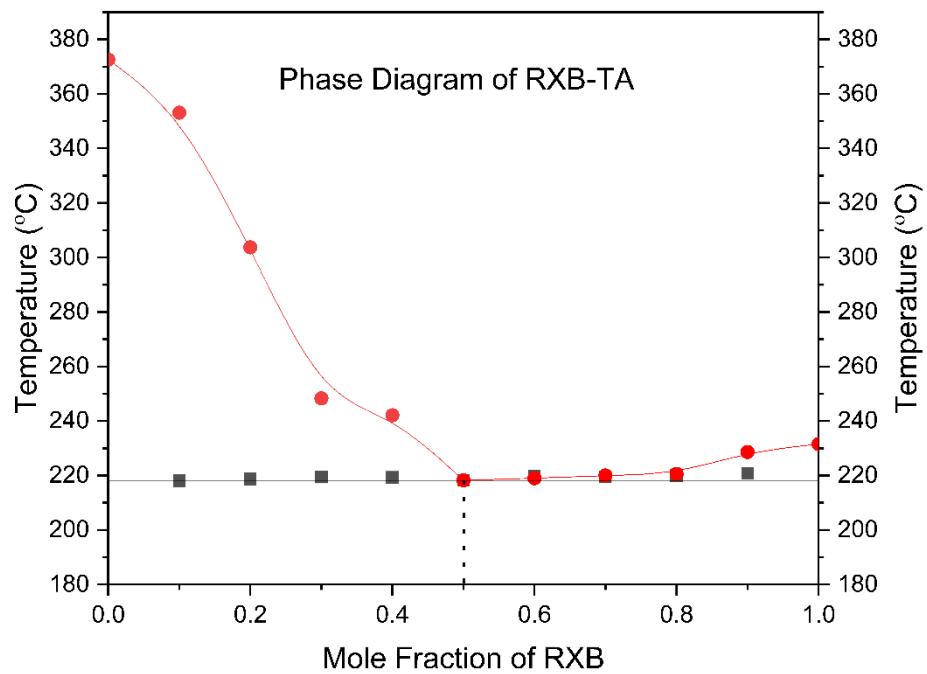

(e)

**Figure S1.** Binary Phase diagrams of eutectics, (a) RXB-CA, (b) RXB-FA, (c) RXB-SA, (d) RXB-MA and (e) RXB-TA.

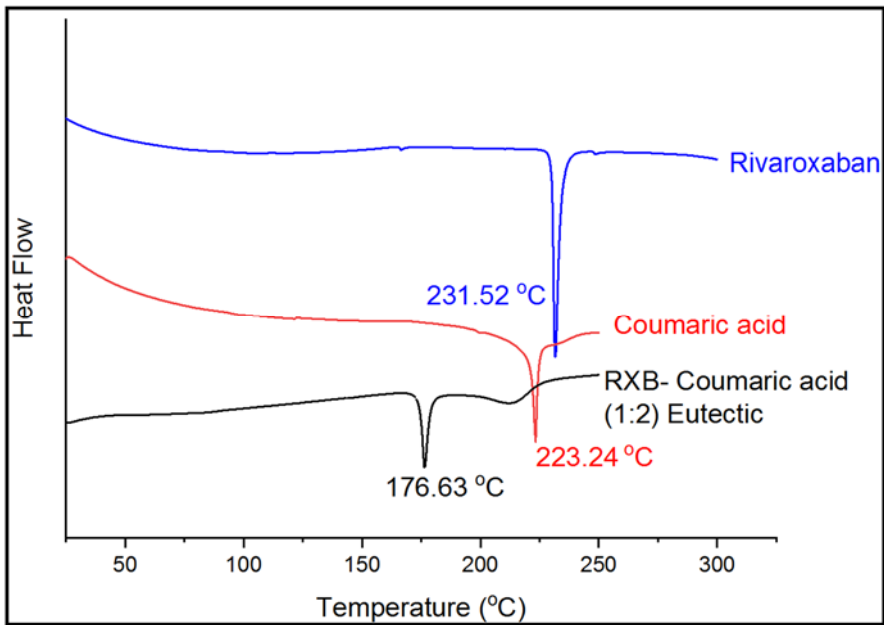

(a)

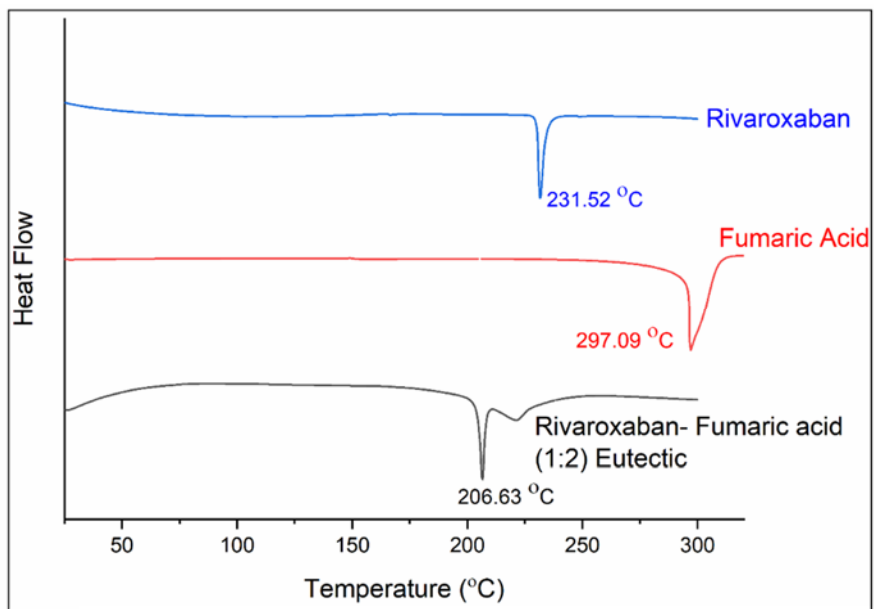

(b)

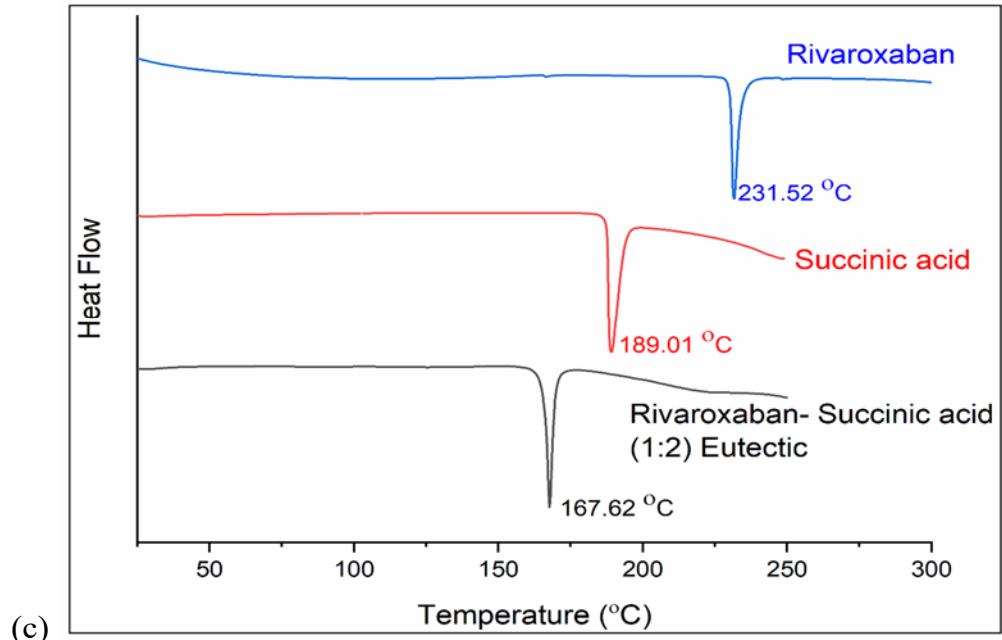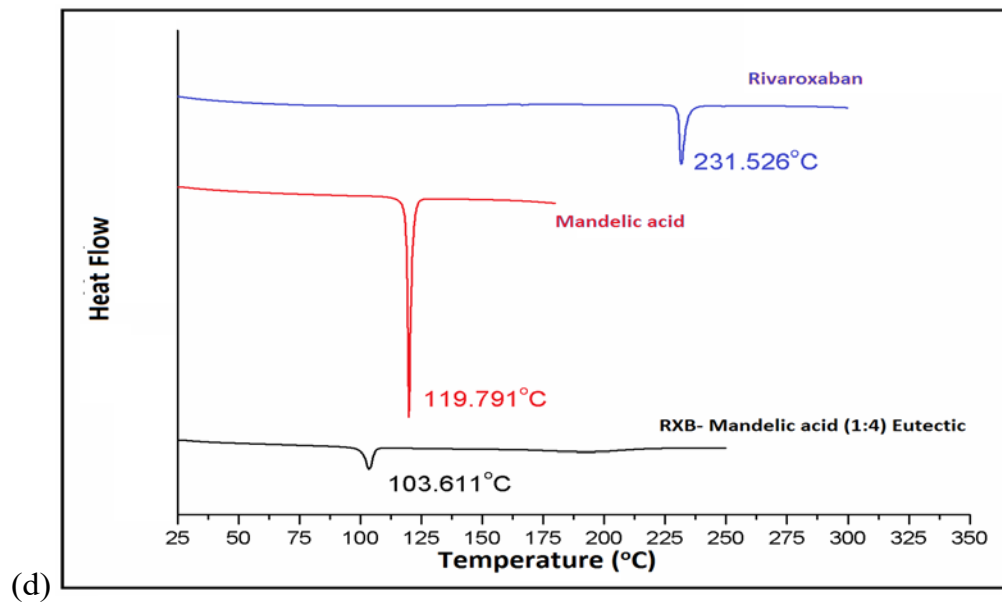

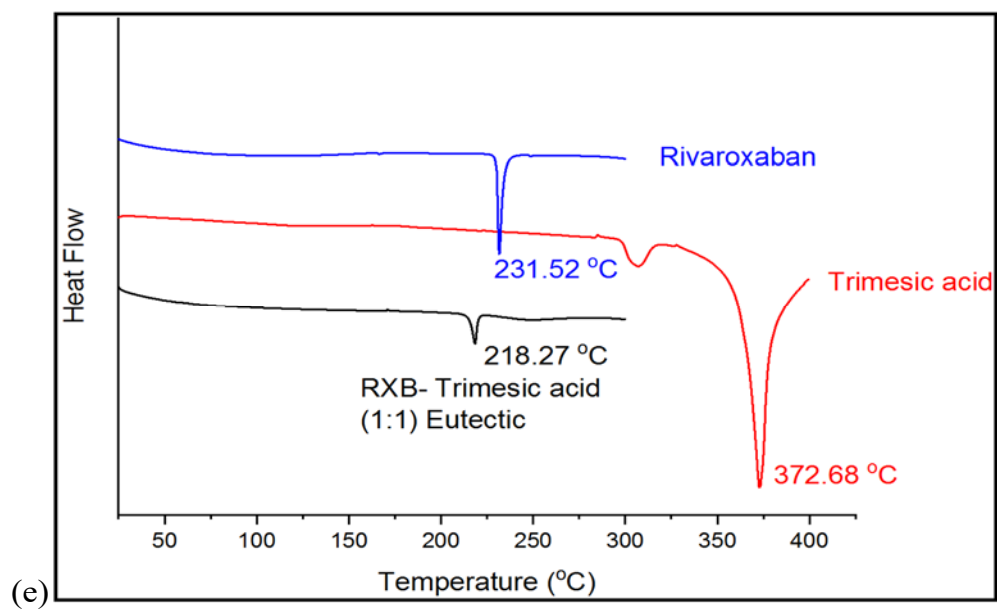

**Figure S2.** DSC thermograms of eutectics, (a) RXB, CA, RXB-CA (1:2), (b) RXB, FA, RXB-FA (1:2), (c) RXB, SA, RXB-SA (1:2), (d) RXB, MA, RXB-MA (1:4) and (e) RXB, TA, RXB-TA (1:1).



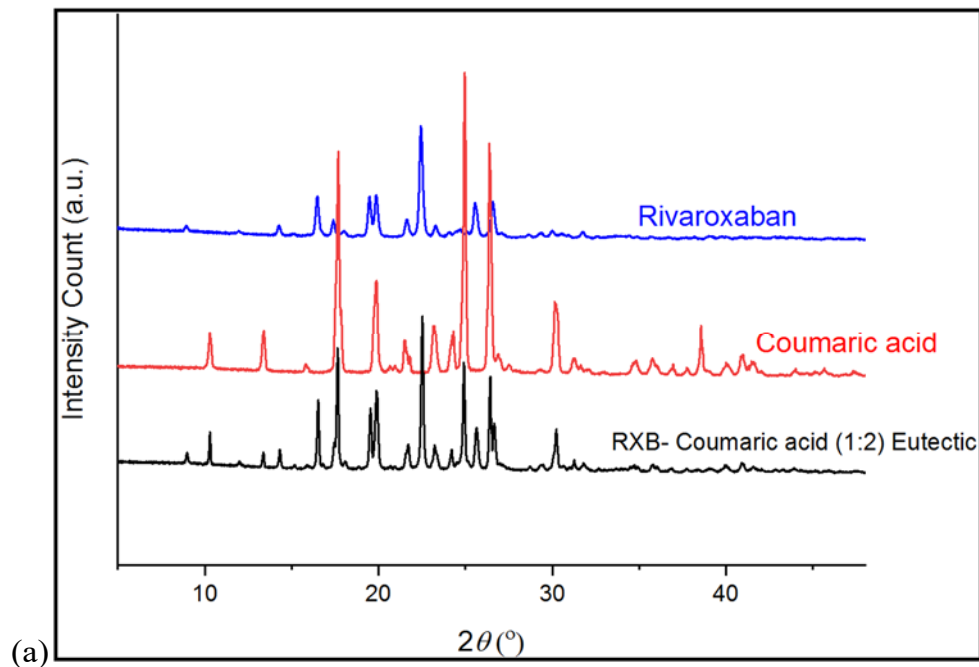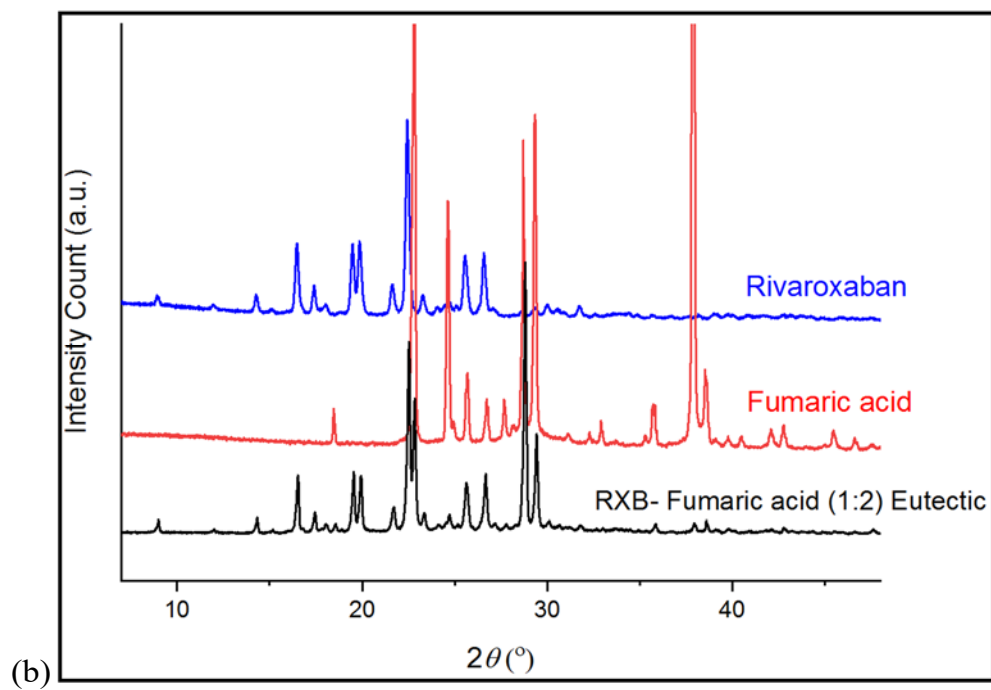

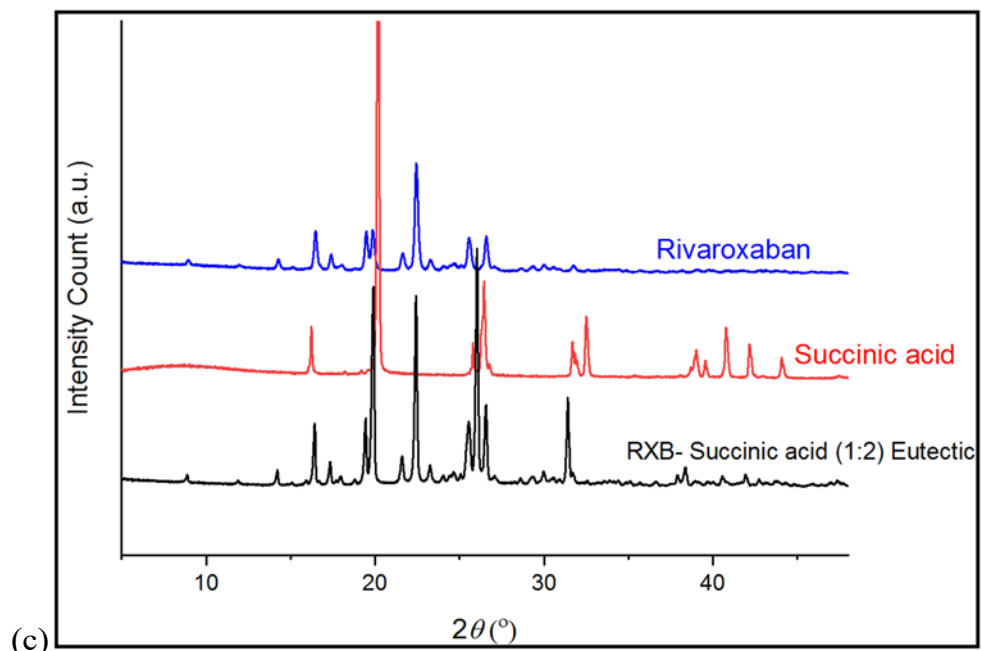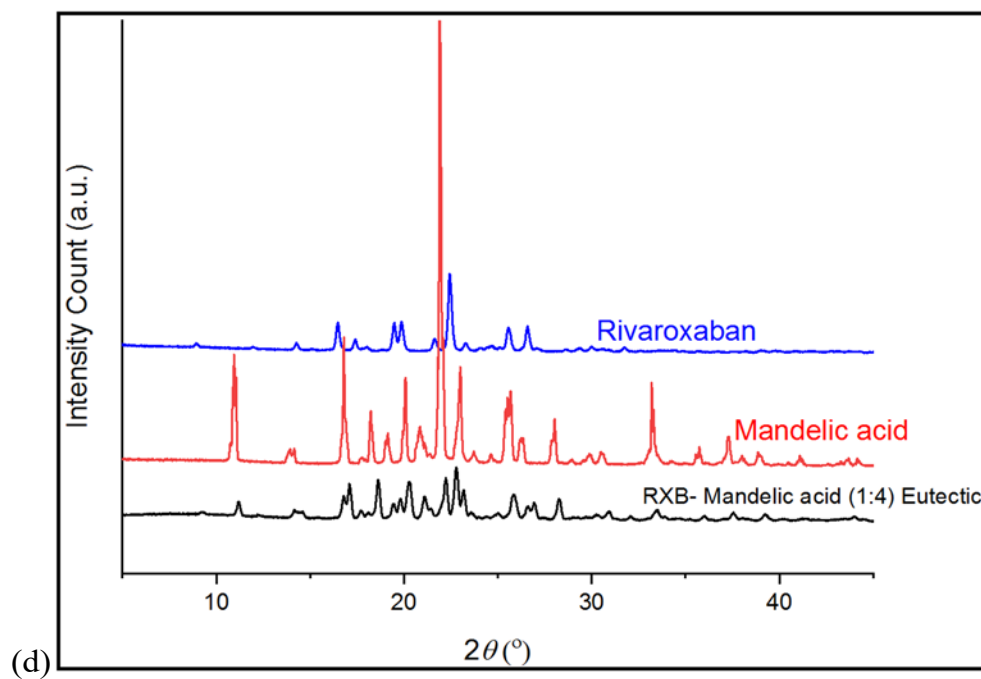

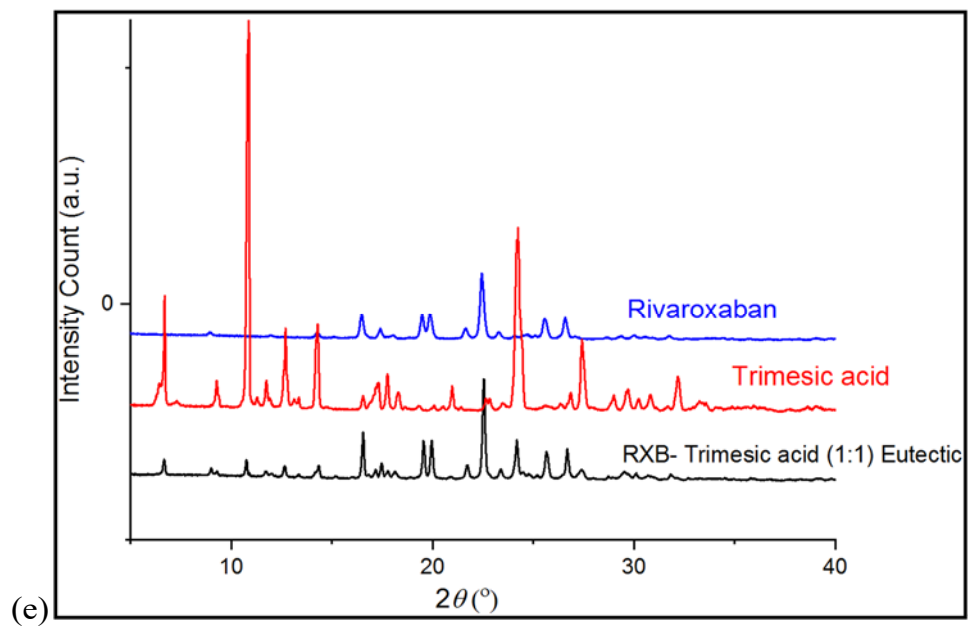

(e) **Figure S3.** PXRD profiles of eutectics, (a) RXB, CA, RXB-CA (1:2), (b) RXB, FA, RXB-FA (1:2), (c) RXB, SA, RXB-SA (1:2), (d) RXB, MA, RXB-MA (1:4) and (e) RXB, TA, RXB-TA (1:1).

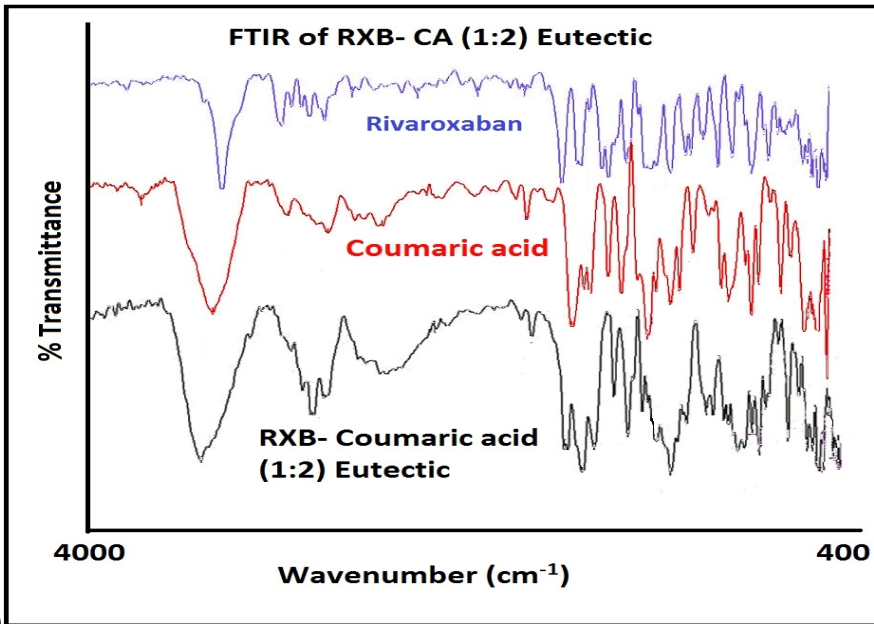

(a)

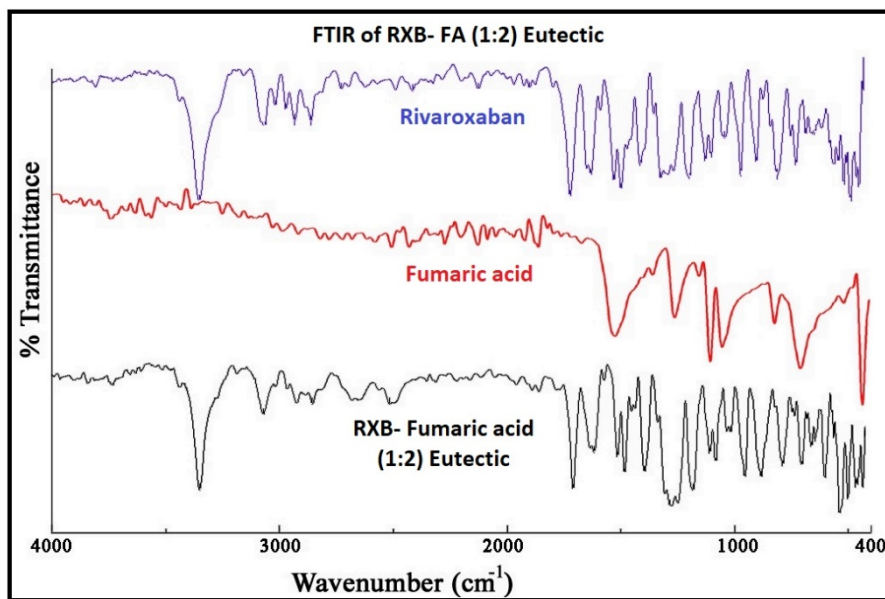

(b)

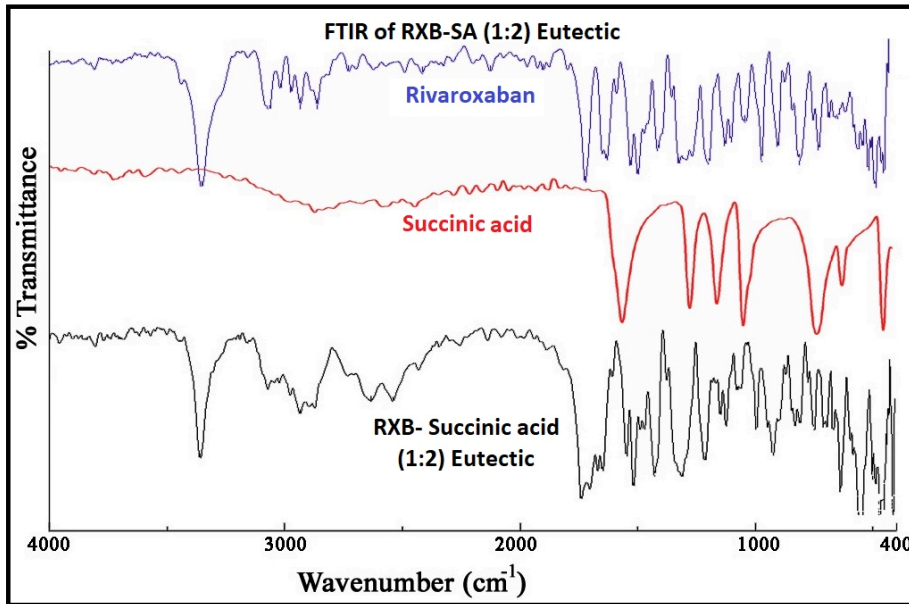

(c)

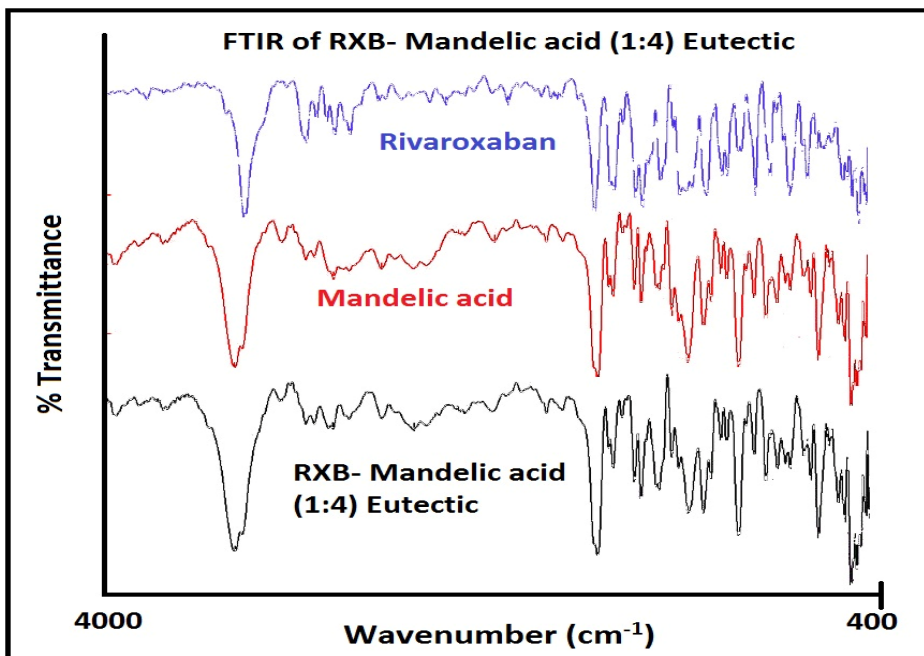

(d)



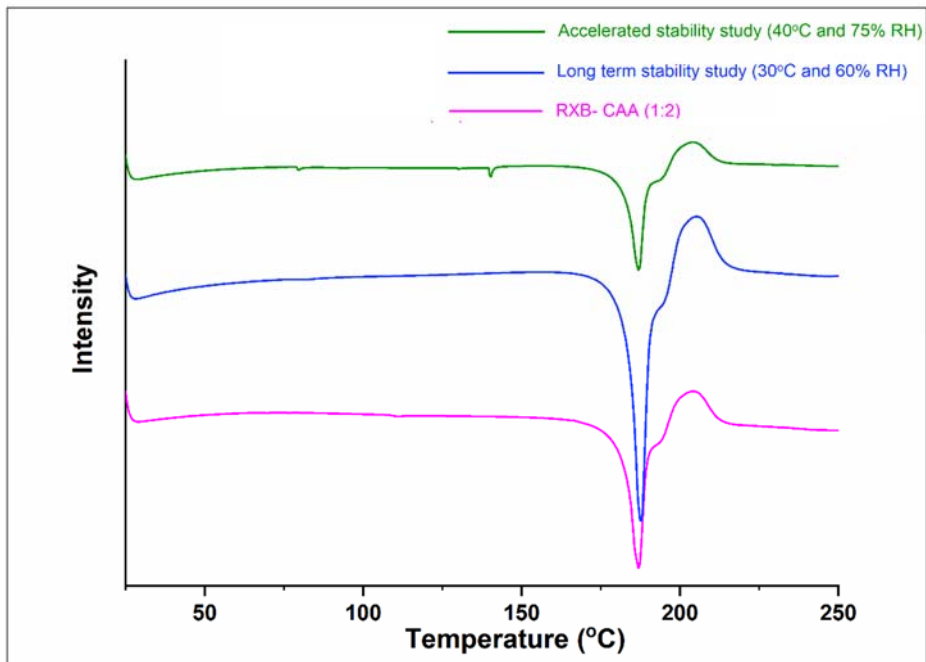

(a)

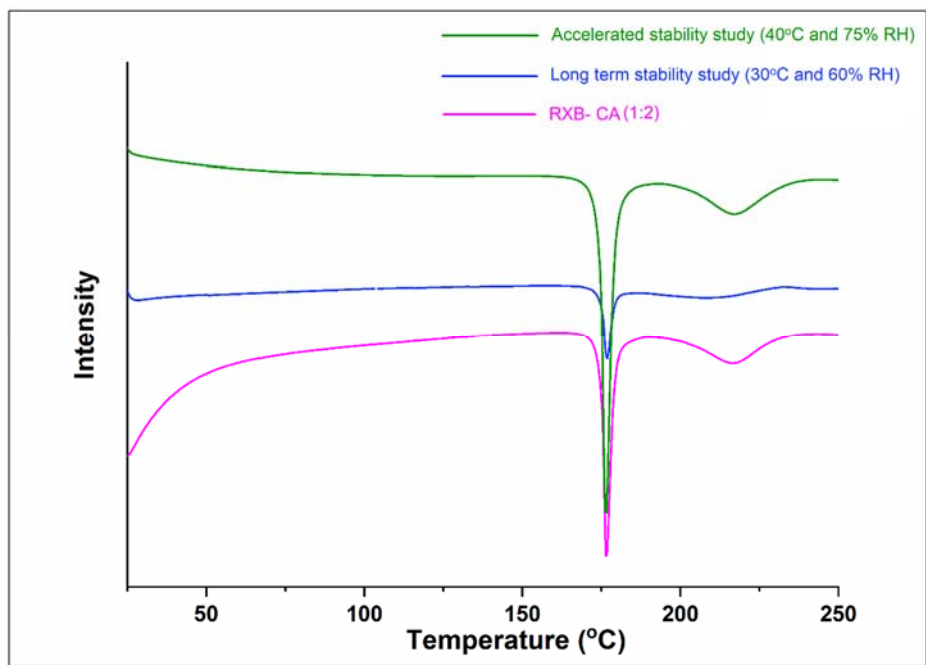

(b)

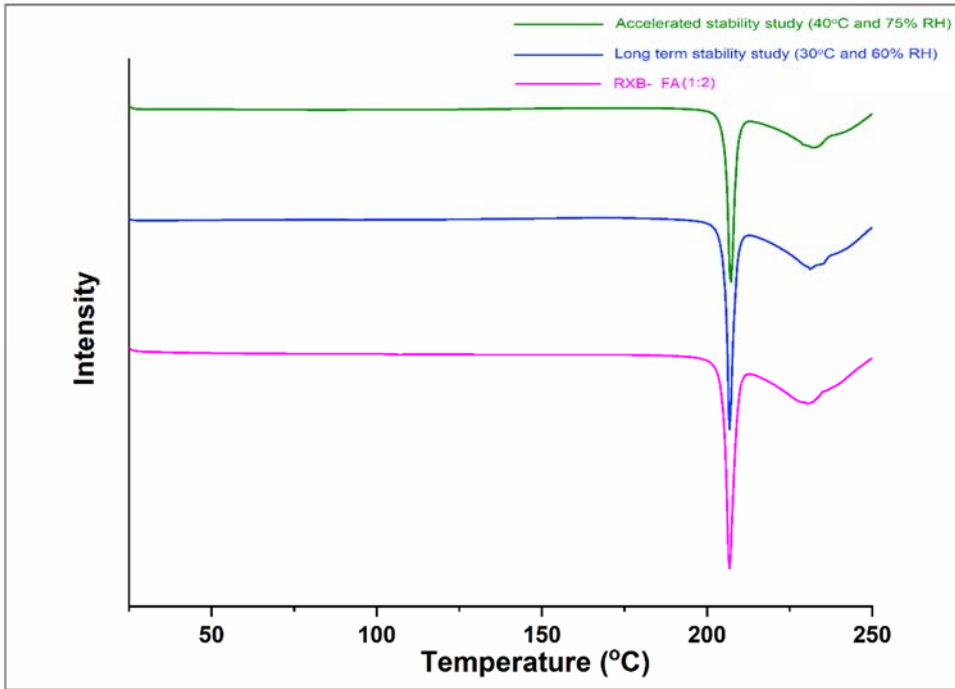

(c)

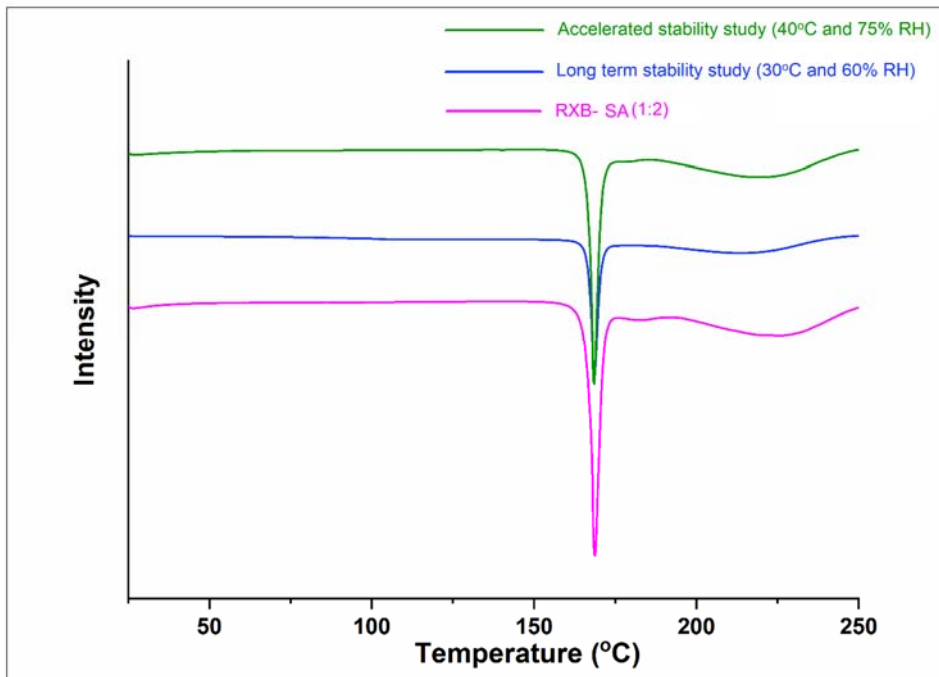

(d)



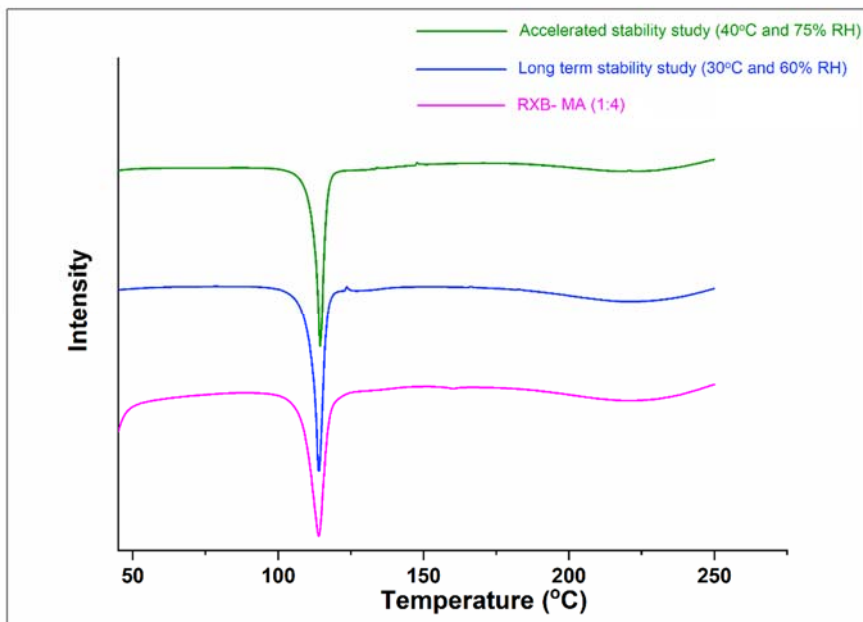

(e)

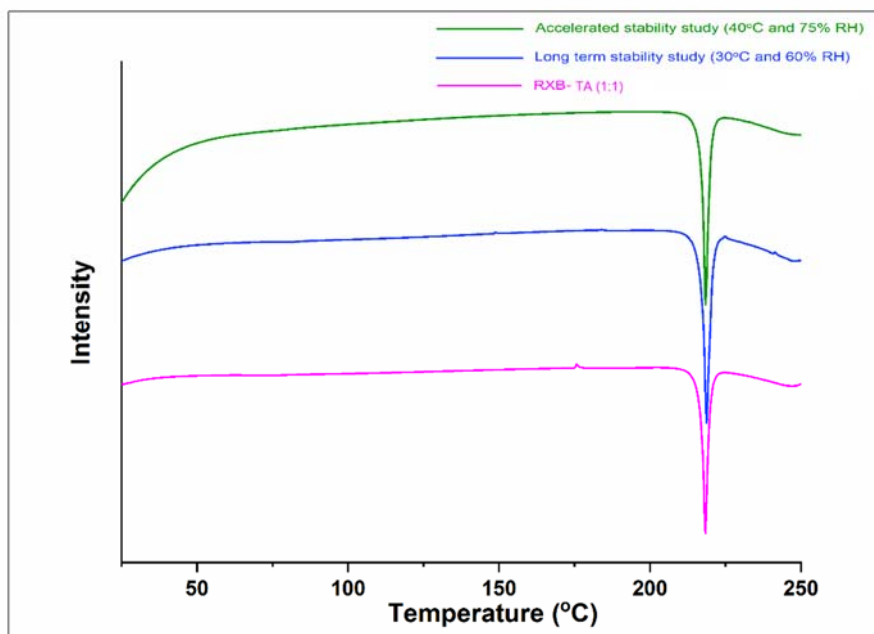

(f)

**Figure S5.** DSC profiles of eutectics recorded after accelerated and long-term stability study conditions, (a) RXB- CAA (1:2), (b) RXB- CA (1:2), (c) RXB- FA (1:2), (d) RXB-SA (1:2), (e) RXB- MA (1:4) and (f) RXB- TA (1:1).

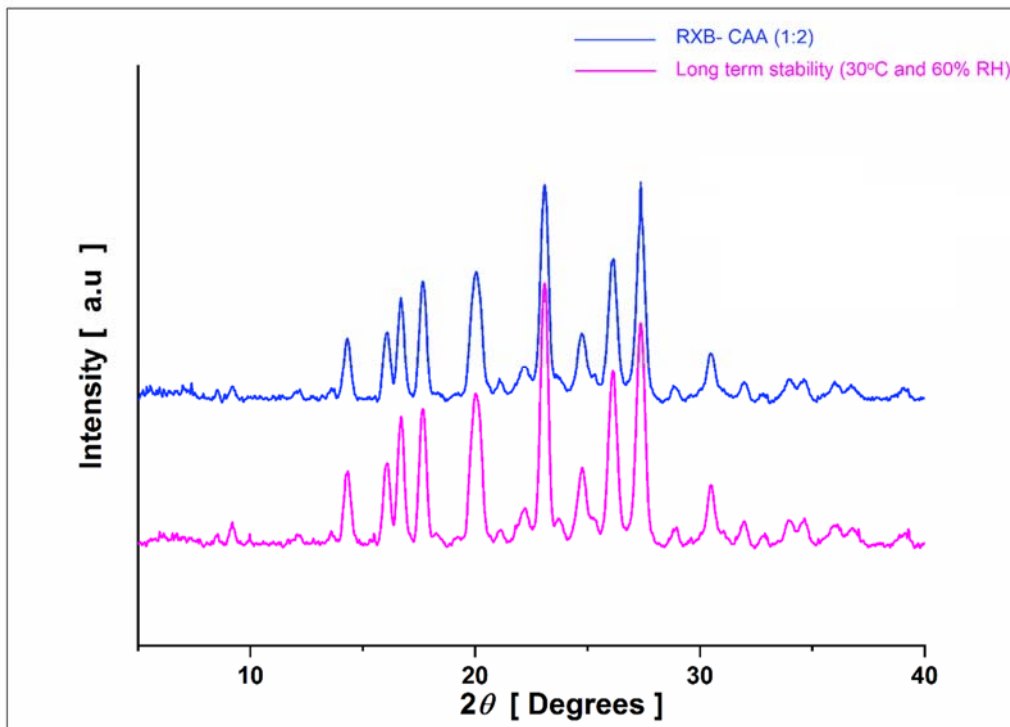

(a)

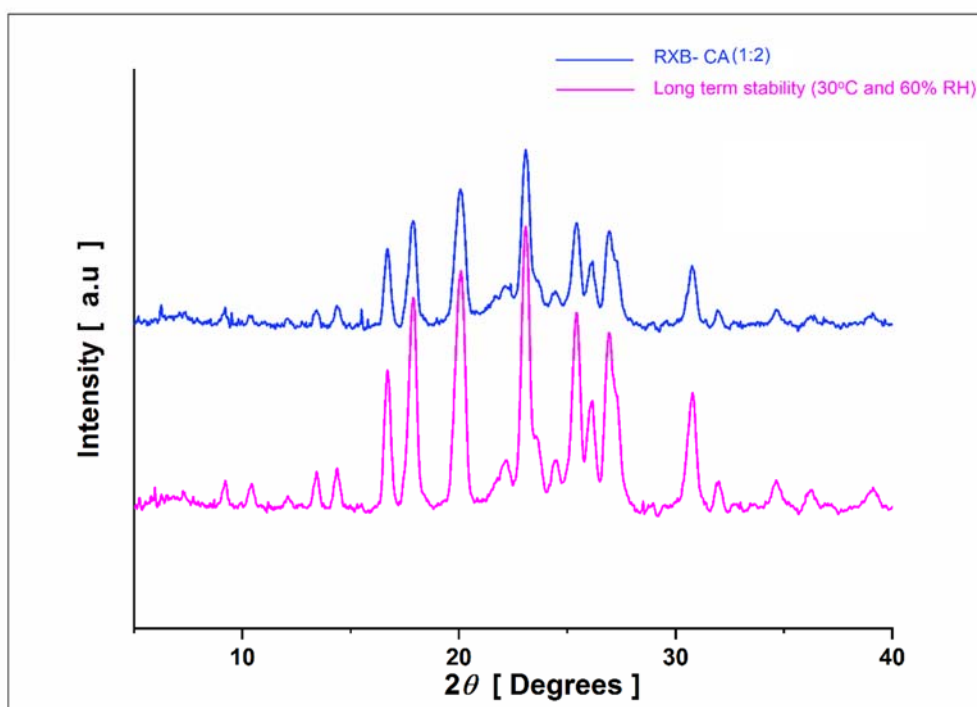

(b)

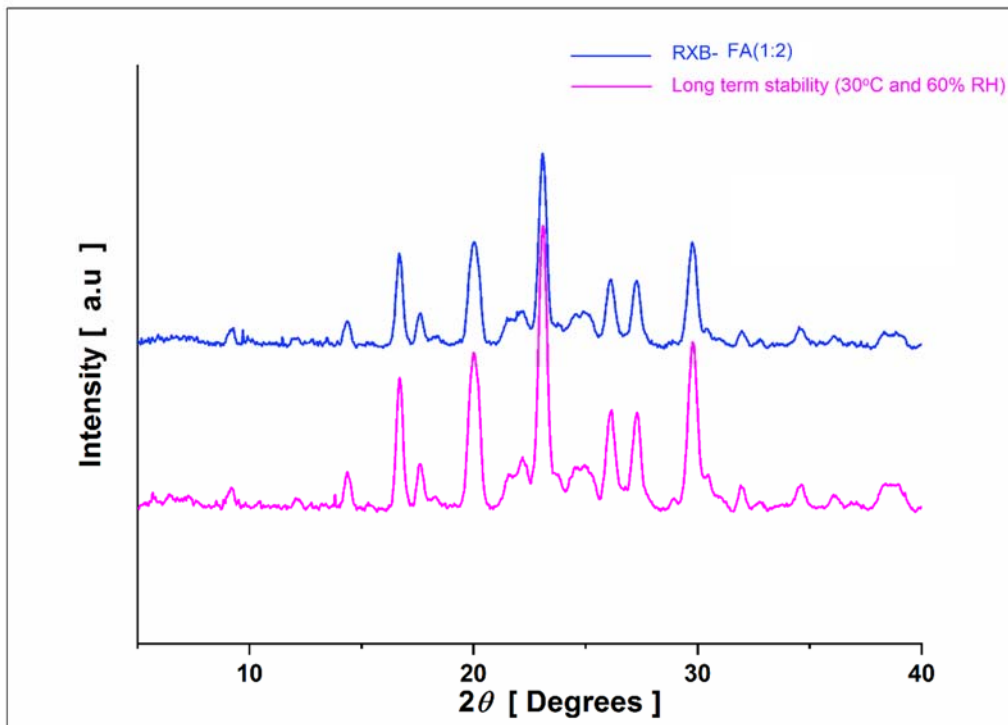

(c)

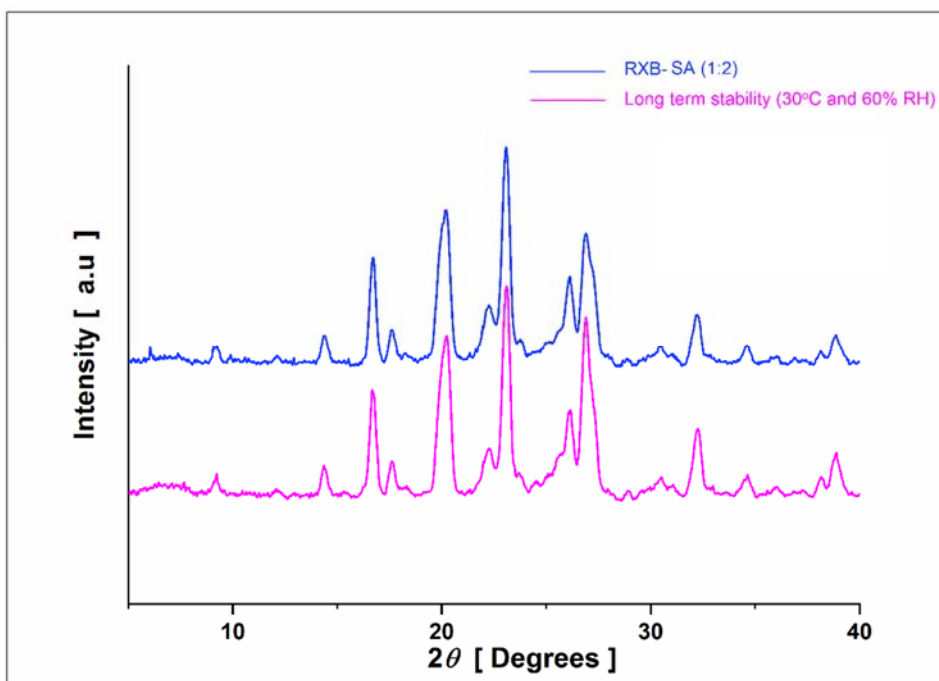

(d)

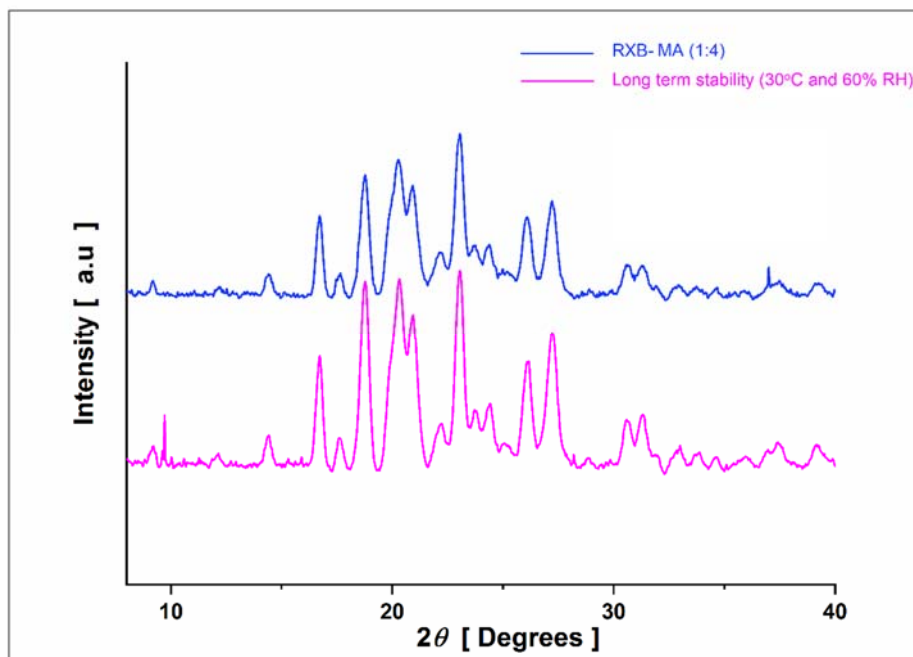

(e)

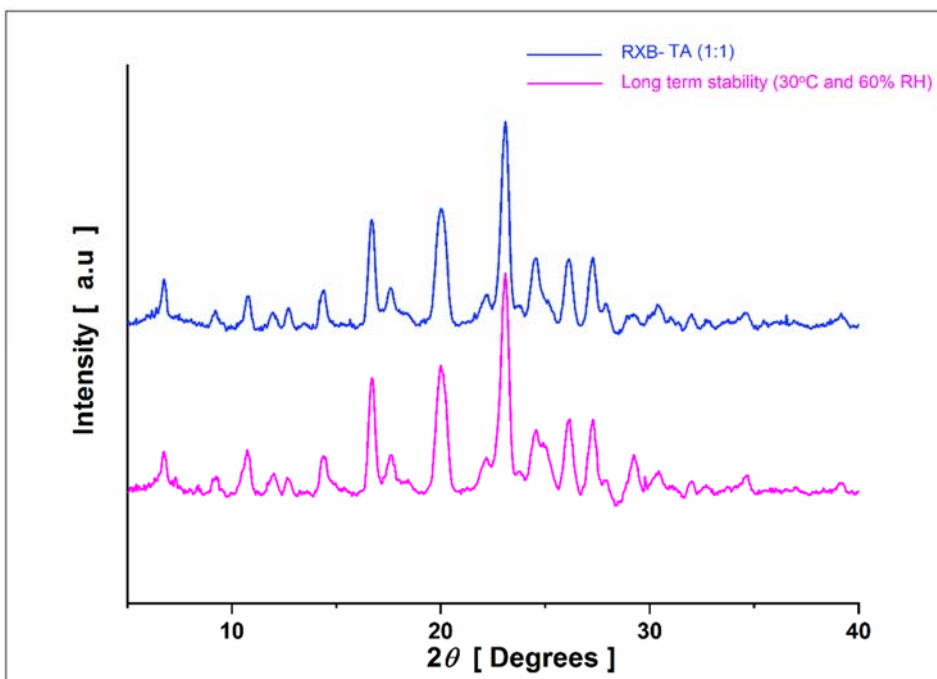

(f)

**Figure S6.** PXR D measured for eutectics after long term stability studies, (a) RXB- CAA (1:2), (b) RXB- CA (1:2), (c) RXB- FA (1:2), (d) RXB- SA (1:2), (e) RXB- MA (1:4) and (f) RXB- TA (1:1) suggesting no new crystal phase was formed.

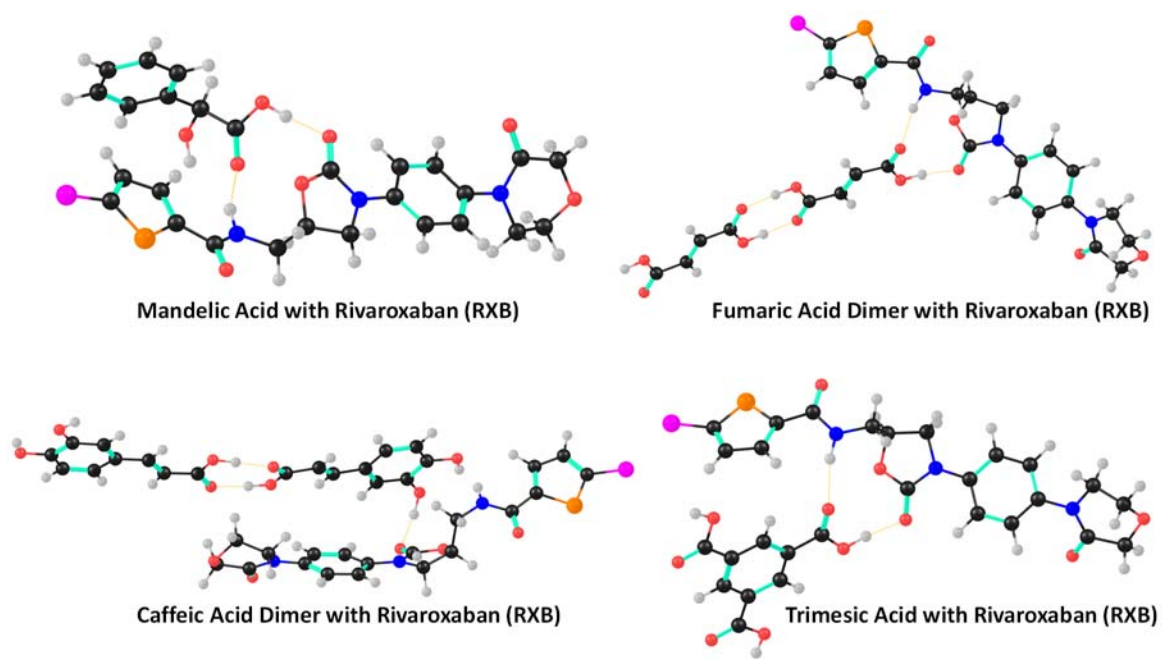

**Figure S7.** The optimized structures of different eutectic system (heterosynthons) at B3LYP/TZVP level of theory.

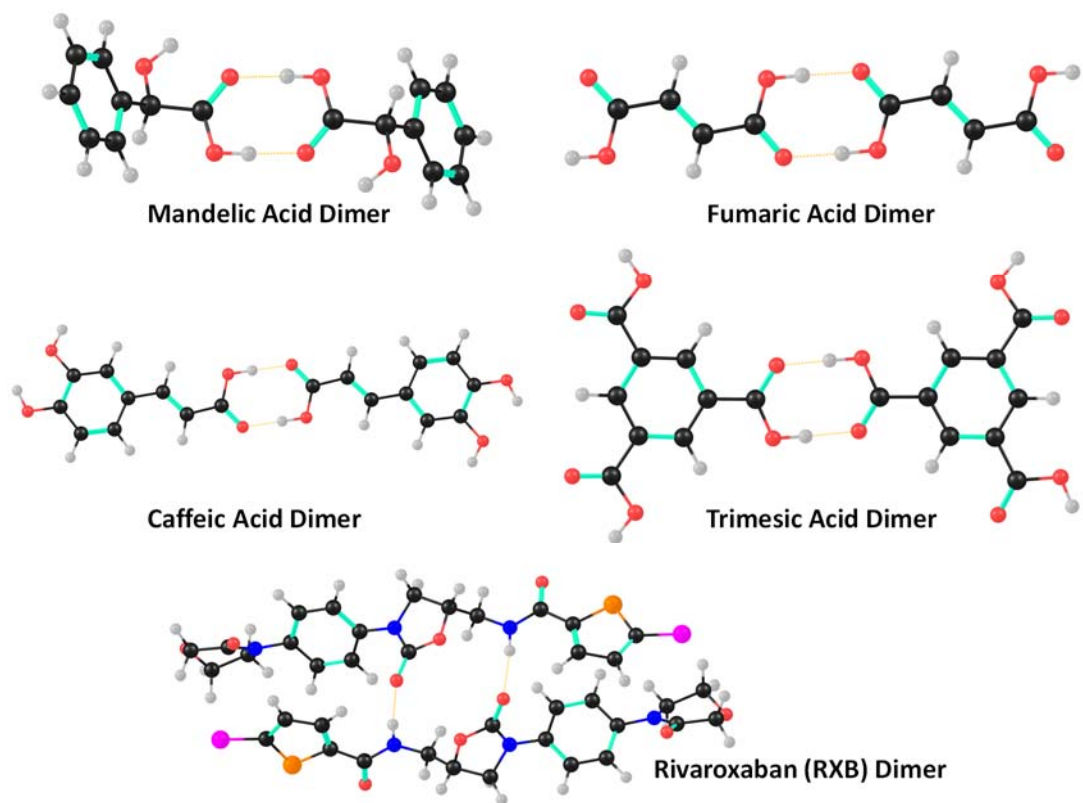

**Figure S8.** The optimised structures of acids and RXB dimers (homosynthons) at B3LYP/TZVP level of theory.

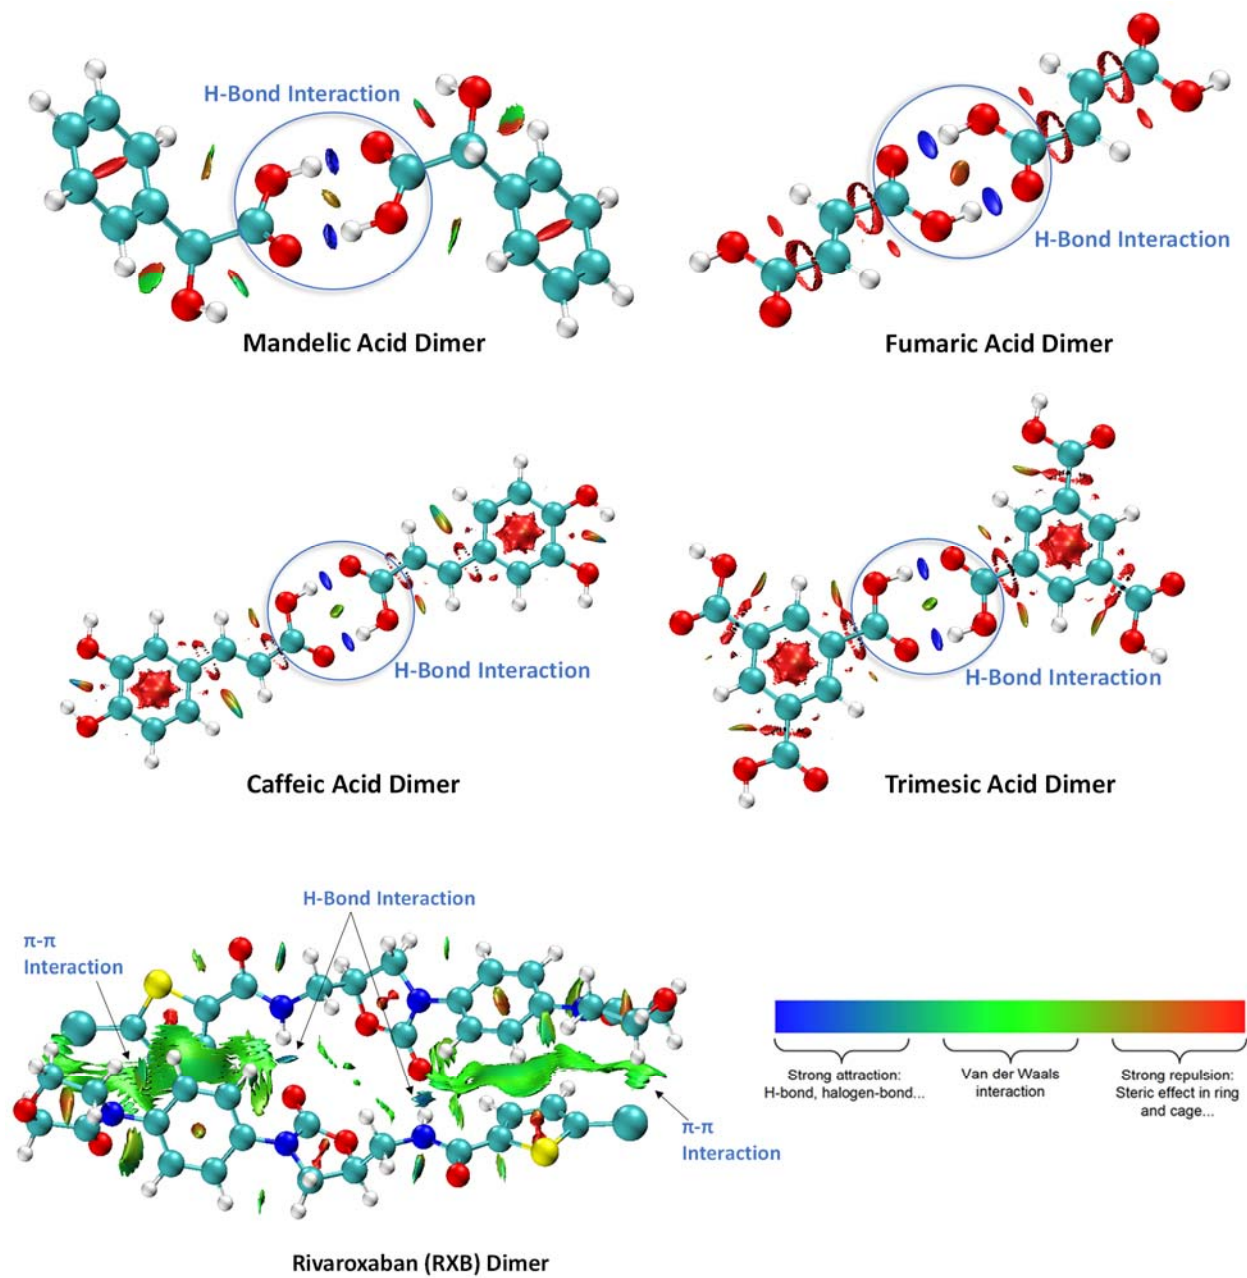

**Figure S9.** The NCI plot for different acids and RXB dimer.

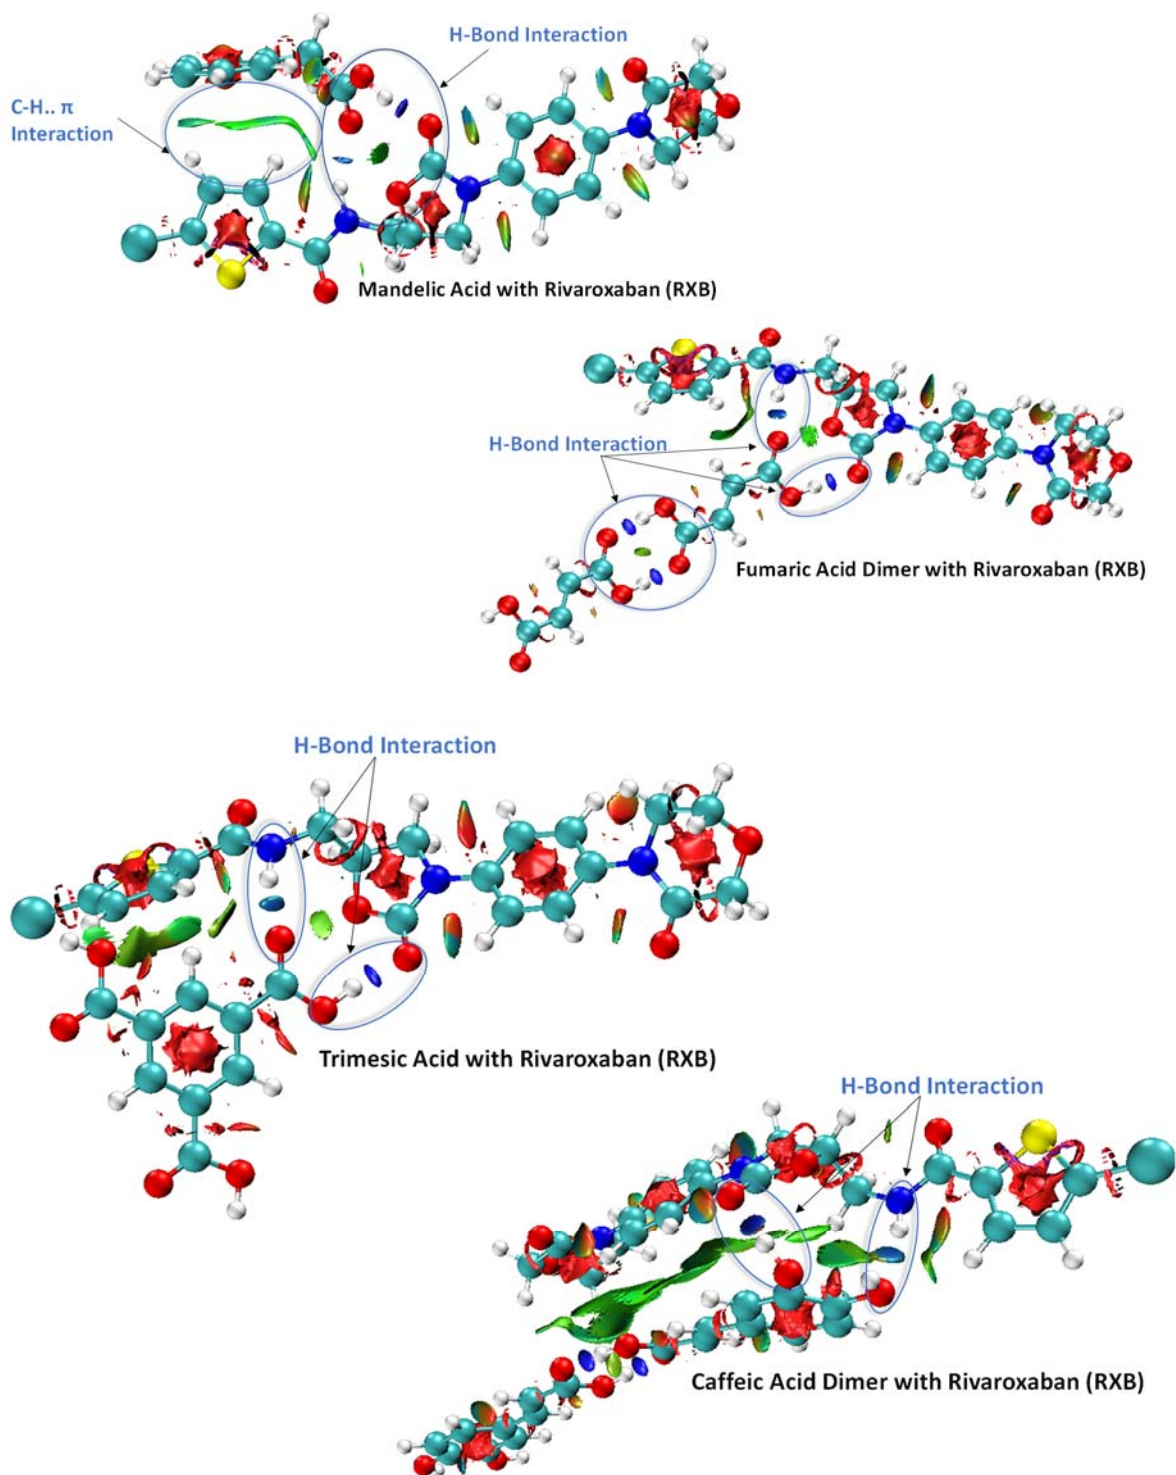

**Figure S10.** The NCI plot for different eutectic systems.



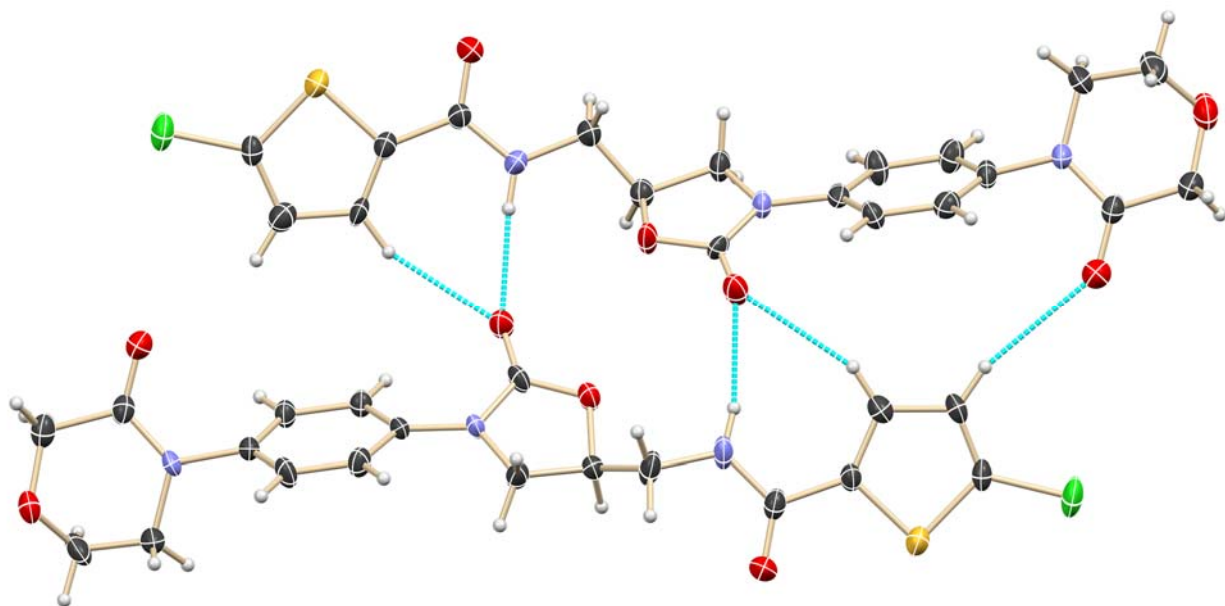

**Figure S11.** The crystal structure of RXB showing dimeric associations similar to predicted structure obtained using DFT studies.

**Table S1.** Samples showing reduction in melting temperature after physical examination.

| Sr. No. | Sample (RXB + Coformer)      | Reduced melting temperature<br>(x/✓) |
|---------|------------------------------|--------------------------------------|
| 1       | RXB + Adipic Acid            | x                                    |
| 2       | RXB + Ascorbic Acid          | x                                    |
| 3       | RXB + Benzoic Acid           | x                                    |
| 4       | RXB + Caffeic Acid (RXB-CAA) | ✓                                    |
| 5       | RXB + Cinnamic Acid          | x                                    |
| 6       | RXB + Citric Acid            | x                                    |
| 7       | RXB + Coumaric Acid (RXB-CA) | ✓                                    |
| 8       | RXB + Fumaric Acid (RXB-FA)  | ✓                                    |
| 9       | RXB + Glutamic Acid          | x                                    |
| 10      | RXB + Malic Acid             | x                                    |
| 11      | RXB + Mandelic Acid (RXB-MA) | ✓                                    |
| 12      | RXB + Oxalic Acid            | x                                    |
| 13      | RXB + Salicylic acid         | x                                    |
| 14      | RXB + Stearic Acid           | x                                    |
| 15      | RXB + Succinic Acid (RXB-SA) | ✓                                    |
| 16      | RXB + Trimesic Acid (RXB-TA) | ✓                                    |
| 17      | RXB + Vanillic Acid          | x                                    |

**Table S2.** Observed vibrational frequencies for eutectics, RXB, CA, RXB-CA (1:2), FA, RXB-FA (1:2), SA, RXB-SA (1:2), MA, RXB-MA (1:4), TA and RXB-TA (1:1).

| RXB<br>(cm-1) | CA<br>(cm-1) | RXB-CA<br>(1:2)<br>(cm-1)          | FA<br>(cm-1) | RXB-FA<br>(1:2)<br>(cm-1) | SA<br>(cm-1) | RXB-SA<br>(1:2)<br>(cm-1) | MA<br>(cm-1)        | RXB-MA<br>(1:4)<br>(cm-1) | TA<br>(cm-1) | RXB-TA<br>(1:1)<br>(cm-1) |
|---------------|--------------|------------------------------------|--------------|---------------------------|--------------|---------------------------|---------------------|---------------------------|--------------|---------------------------|
| 3366          | 3400         | 3364                               | 1272         | 3366.5                    | 1302         | 3368                      | 1431                | 367                       | 1465         | 3361                      |
| 1737          | 1694         | 1725                               | 1626         | 1738                      | 1093         | 1737.5                    | 1717                | 1717                      | 1715         | 1735                      |
| 832           | 1449         | 831                                | 702          | 830                       | 603          | 838                       | -OH peak was merged | 835                       |              | 835                       |
|               |              | 1433                               |              | 1623                      |              | 1311                      |                     | 1432                      |              | 1468                      |
|               |              | 1705                               |              | 1280                      |              | 1102                      |                     | 1717.5                    |              | 1713                      |
|               |              | -OH peak was merged into -C=O peak |              | 703                       |              | 604                       |                     |                           |              |                           |

**Table S3.** Saturation solubility study of eutectics, RXB, RXB-CAA (1:2), RXB-CA (1:2), RXB-FAA (1:2), RXB-SA (1:2), RXB-MA (1:4) and RXB-TA (1:1) and physical mixtures in distilled water.

| Sr. No. | RXB and mixtures (mol:mol) | Saturation solubility for eutectics ( $\mu\text{g/mL}$ ) $\pm$ S.D. | Saturation solubility for physical mixtures ( $\mu\text{g/mL}$ ) $\pm$ S.D. |
|---------|----------------------------|---------------------------------------------------------------------|-----------------------------------------------------------------------------|
| 1       | Rivaroxaban (RXB)          | $5.49 \pm 0.13$                                                     | $5.49 \pm 0.13$                                                             |
| 2       | RXB-CAA (1:2)              | $7.32 \pm 0.22$                                                     | $5.51 \pm 0.26$                                                             |
| 3       | RXB-CA (1:2)               | $6.91 \pm 0.19$                                                     | $5.47 \pm 0.17$                                                             |
| 4       | RXB-FA (1:2)               | $6.31 \pm 0.22$                                                     | $5.45 \pm 0.1$                                                              |
| 5       | RXB-SA (1:2)               | $5.54 \pm 0.33$                                                     | $5.44 \pm 0.18$                                                             |
| 6       | RXB-MA (1:4)               | $5.51 \pm 0.27$                                                     | $5.45 \pm 0.21$                                                             |
| 7       | RXB-TA (1:1)               | $5.62 \pm 0.28$                                                     | $5.42 \pm 0.16$                                                             |

**Table S4.** Dissolution rate data of RXB and Physical Mixtures (mol:mol), RXB- CAA, RXB- CA, RXB-FA, RXB-SA, RXB-MA and RXB-TA.

| <b>Sample Name</b> | <b>% Cumulative Release (at 60 min)</b> |
|--------------------|-----------------------------------------|
| RXB                | 16.47%                                  |
| RXB- CAA (1:2)     | 17%                                     |
| RXB- CA (1:2)      | 16.33%                                  |
| RXB- FA (1:2)      | 16.90%                                  |
| RXB- SA (1:2)      | 16.52%                                  |
| RXB- MA (1:4)      | 16.17%                                  |
| RXB- TA (1:1)      | 16.64%                                  |

**Table S5.** Dissolution rate data of eutectics, RXB, RXB- CAA, RXB- CA and RXB-FA.

| Time | RXB (%CR)  | RXB- CAA<br>(%CR) | RXB- CA (%CR) | RXB- FA (%CR) |
|------|------------|-------------------|---------------|---------------|
| 0    | 0±0        | 0±0               | 0±0           | 0±0           |
| 5    | 0±0        | 3.17±0.6          | 1.30±0.51     | 4.31±0.67     |
| 10   | 0.73±0.5   | 6.06±1.36         | 4.86±1.65     | 9.35±1.75     |
| 15   | 2.30±0.75  | 8.92±1.76         | 7.78±0.41     | 12.13±0.53    |
| 20   | 4.21±1.3   | 12.44±2.14        | 11.06±0.97    | 15.38±1.23    |
| 30   | 8.16±1.78  | 15.85±1.12        | 16.13±2.193   | 19.81±2.33    |
| 45   | 12.04±2.11 | 21.73±2.34        | 22.66±2.31    | 24.50±3.33    |
| 60   | 16.47±3.11 | 26.37±3.02        | 27.44±4.02    | 28.36±2.02    |

**Table S6.** Theoretical Log P values of RXB and cofomers.

| Sr. No. | RXB and Eutectics | logP of RXB and cofomer |
|---------|-------------------|-------------------------|
| 1       | Rivaroxaban (RXB) | 1.5 <sup>a</sup>        |
| 2       | CAA               | 1.80 <sup>b</sup>       |
| 3       | CA                | 1.71 <sup>b</sup>       |
| 4       | FA                | -0.288 <sup>b</sup>     |
| 5       | SA                | -0.064 <sup>b</sup>     |
| 6       | MA                | 0.805 <sup>b</sup>      |
| 7       | TA                | 0.78 <sup>b</sup>       |

## References

a – W. Mueck, J. Stampfuss, D. Kubitzka and M. Becka M. Clinical pharmacokinetic and pharmacodynamic profile of rivaroxaban. *Clin. Pharmacokinet.* 2014, **53**, 1-16. doi: 10.1007/s40262-013-0100-7

b – Theoretical log P values using Crippen method

**Table S7.** The interaction energies ( $\Delta E_{\text{int}}$  and  $\Delta G_{\text{int}}$ ) calculated using B3LYP-D3/def-TZVP level of theory.

| S.N. | Molecular structure                                                                                                                        | Interaction Energy (kcal/mol) |                         |
|------|--------------------------------------------------------------------------------------------------------------------------------------------|-------------------------------|-------------------------|
|      |                                                                                                                                            | $\Delta E_{\text{int}}$       | $\Delta G_{\text{int}}$ |
| 1.   | 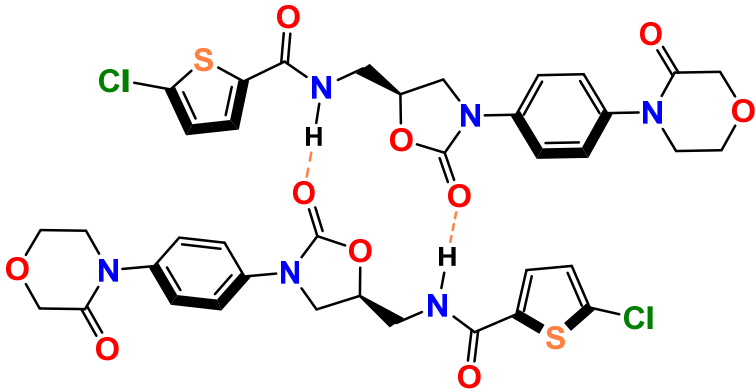 <p style="text-align: center;">RXB</p>                  | -29.0                         | -8.8                    |
| 2.   |  <p style="text-align: center;">Mandelic Acid (MA)</p>   | -18.7                         | -5.8                    |
| 3.   |  <p style="text-align: center;">Mandelic Acid (MA)</p> | -17.6                         | -4.9                    |



|    |                                                                                                                |       |      |
|----|----------------------------------------------------------------------------------------------------------------|-------|------|
| 4. | 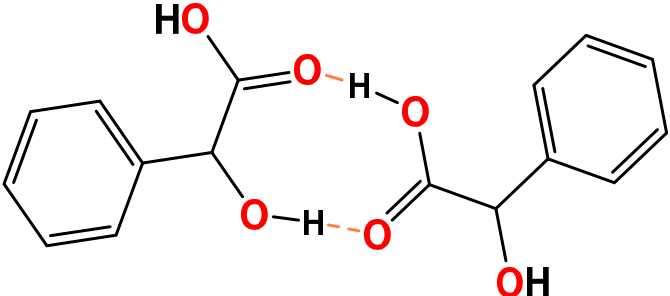 <p>Mandelic Acid (MA)</p>   | -15.1 | -2.4 |
| 5. |  <p>Fumaric Acid (FA)</p>    | -18.9 | -6.4 |
| 6. |  <p>Fumaric Acid (FA)</p>    | -4.2  | 8.2  |
| 7. |  <p>Caffeic Acid (CAA)</p> | -19.8 | -6.9 |

|     |                                                                                                                                          |       |      |
|-----|------------------------------------------------------------------------------------------------------------------------------------------|-------|------|
| 8.  | 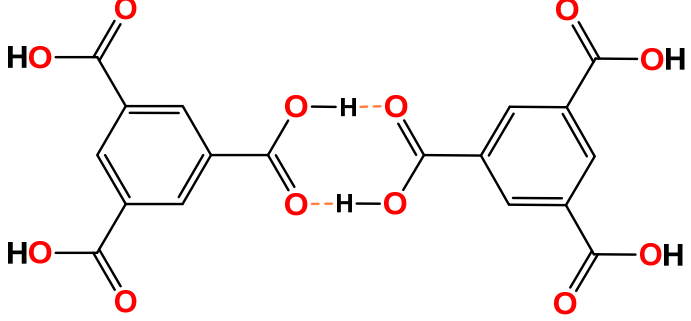 <p style="text-align: center;">Trimesic Acid (TA)</p> | -19.4 | -6.6 |
| 9.  |  <p style="text-align: center;">RXB-MA (1:1)</p>       | -21.5 | -5.6 |
| 10. |  <p style="text-align: center;">RXB-FA (1:2)</p>     | -19.7 | -3.3 |
| 11. |  <p style="text-align: center;">RXB-FA (1:1)</p>     | -9.4  | 3.2  |

|     |                                                                                                                                     |       |      |
|-----|-------------------------------------------------------------------------------------------------------------------------------------|-------|------|
| 12. | 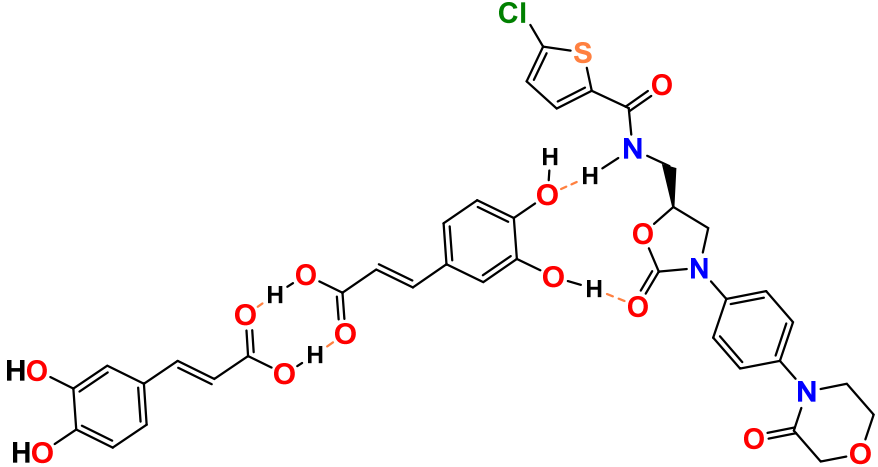 <p style="text-align: center;">RXB-CAA (1:2)</p> | -26.9 | -5.5 |
| 13. |  <p style="text-align: center;">RXB-TA (1:1)</p> | -21.1 | -4.5 |
